# Supplementary material
Source: PubMed Central journal article supplement (PMC3989441)
Supplement: NIHMS568237-supplement-1.pdf [file NIHMS568237-supplement-1.pdf]

### Supplemental Figures

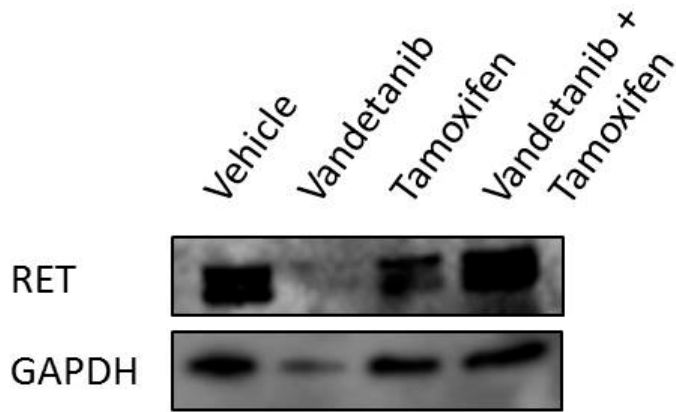

**Supplemental Figure 1. RET expression with Drug Treatment.** Western blot showing RET expression in MCF-7 cells treated with vehicle, vandetanib, tamoxifen, or both drugs. Tamoxifen treatment reduces, but does not eliminate RET expression compared to vehicle treatment.

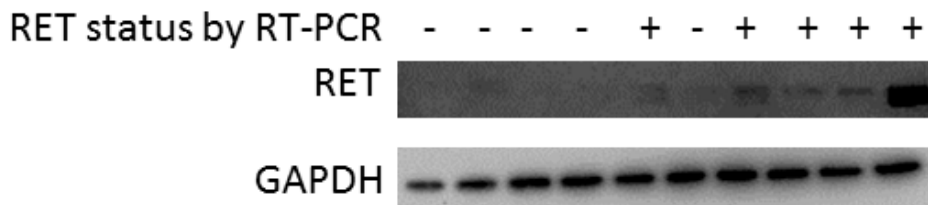

**Supplemental Figure 2. RET Protein Expression in a Subset of Primary Cancers.** Western blot showing expression of RET protein in primary cancer isolates. Top row indicates tumors characterized as negative (-) or positive (+) for RET expression by RNA analysis.
